# Supplementary material for: Eco-friendly and high-performance photoelectrochemical anode based on AgInS2 quantum dots embedded in 3D graphene nanowalls
Source: Royal Society of Chemistry journal article supplement (doi:10.1039/c9tc01395d), 2019-01-01
Supplement: c9tc01395d1.pdf [file c9tc01395d1.pdf]

## Supplementary information

### **Eco-friendly and High-performance Photoelectrochemical Anode based on AgInS<sub>2</sub> Quantum Dots Embedded in 3D Graphene Nanowalls**

Jinpeng Nong <sup>a,b,†</sup>, Guilian Lan <sup>a,†</sup>, Weifeng Jin <sup>a</sup>, Peng Luo <sup>a</sup>, Caicheng Guo <sup>a</sup>,  
Xiaosheng Tang <sup>a</sup>, Zhigang Zang <sup>\*a</sup>, and Wei Wei <sup>\*a,b</sup>

<sup>a</sup> *Key Laboratory of Optoelectronic Technology & Systems, Ministry of Education of China, College of Optoelectronic Engineering, Chongqing University, Chongqing, 400044, P.R. China.*

<sup>b</sup> *Chongqing Key Laboratory of Multi-scale Manufacturing Technology, Chongqing Institute of Green and Intelligent Technology, Chinese Academy of Sciences, Chongqing 400714, P.R. China.*

<sup>†</sup> *These authors contributed equally.*

<sup>\*</sup> *E-mail: wwei@cqu.edu.cn, zangzg@cqu.edu.cn*

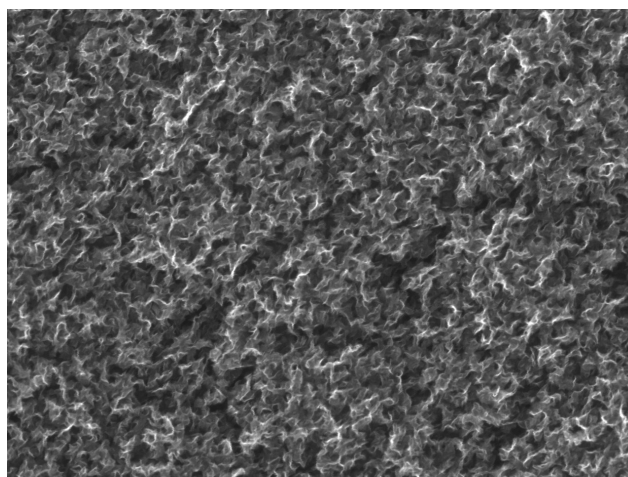

Fig. S1 SEM image of the pure GNWs

Table S1 Calculated average diameters of QDs using Scherrer's formula when X-Ray Wavelength is 0.15418nm.

| S#    | 2θ (deg) | FWHM (deg) | Size (nm) | Average size (nm) |
|-------|----------|------------|-----------|-------------------|
| 120°C | 27       | 4.7        | 1.82      | 2.31              |
|       | 45       | 3.8        | 2.36      |                   |
|       | 54       | 3.4        | 2.74      |                   |
| 150°C | 27       | 3.3        | 2.59      | 3.19              |
|       | 45       | 2.9        | 3.1       |                   |
|       | 54       | 2.4        | 3.88      |                   |
| 180°C | 27       | 2.4        | 3.56      | 4.55              |
|       | 45       | 2.1        | 4.28      |                   |
|       | 54       | 1.6        | 5.82      |                   |

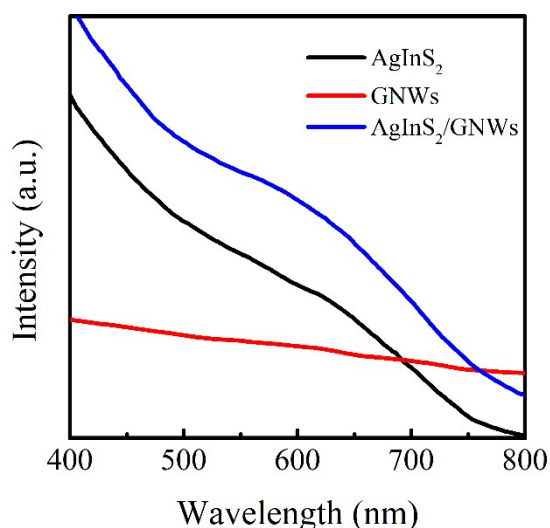

Fig. S2 UV-Vis spectra of AgInS<sub>2</sub>, pure GNWs and AgInS<sub>2</sub>/GNWs. The temperature of AgInS<sub>2</sub> QDs used for measurement here is 180°C. The pure GNWs can absorb a wide range of the visible light due to its wideband absorption feature. After combining with AgInS<sub>2</sub> QDs, the absorption spectrum exhibits the absorption property of AgInS<sub>2</sub> QDs but with a higher absorption, indicating their successful combination.

Table S2 Element content of the GNWs and AgInS<sub>2</sub>/GNWs on SiO<sub>2</sub> substrate.

| wt% | GNWs  | AgInS <sub>2</sub> /GNWs |
|-----|-------|--------------------------|
| C   | 46.32 | 45.57                    |
| O   | 16.30 | 13.45                    |
| Si  | 37.37 | 30.10                    |
| S   | 0     | 7.28                     |
| Ag  | 0     | 1.62                     |
